# Supplementary figures and images for: An octanuclear [Co(ii)2–Co(iii)2]2 interlocked grid—example of an inorganic [2]catenane
Source: Royal Society of Chemistry journal article supplement (doi:10.1039/b510755e), 2005-01-01

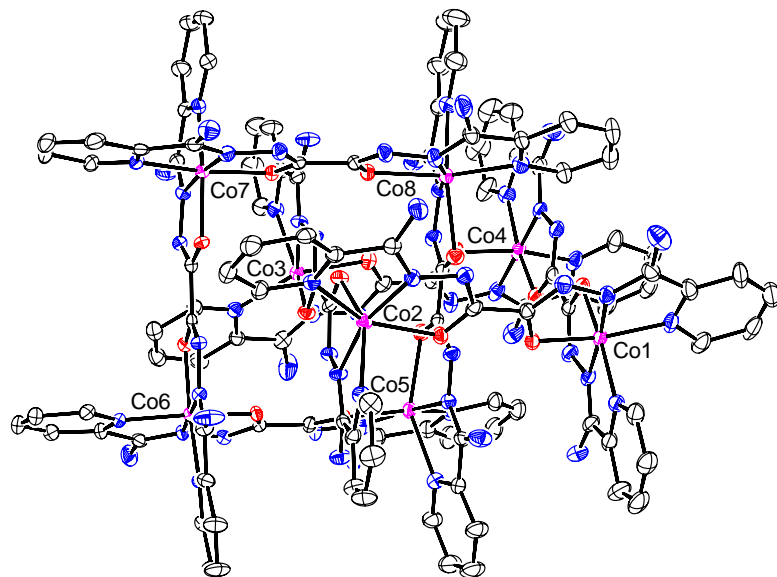

Fig. S1

Supplement: b510755e.pdf [file b510755e.pdf]
